# Supplementary material for: In vitro growth of secondary follicles from cryopreserved-thawed ovarian cortex
Source: PubMed Central journal article supplement — Hum Reprod. 2024 Oct 21;39(12):2743–53. doi: 10.1093/humrep/deae240 (PMC11630006; doi:10.1093/humrep/deae240), 2024-10-21
Supplement: deae240_supplementary_figure_s1.pdf [file deae240_supplementary_figure_s1.pdf]

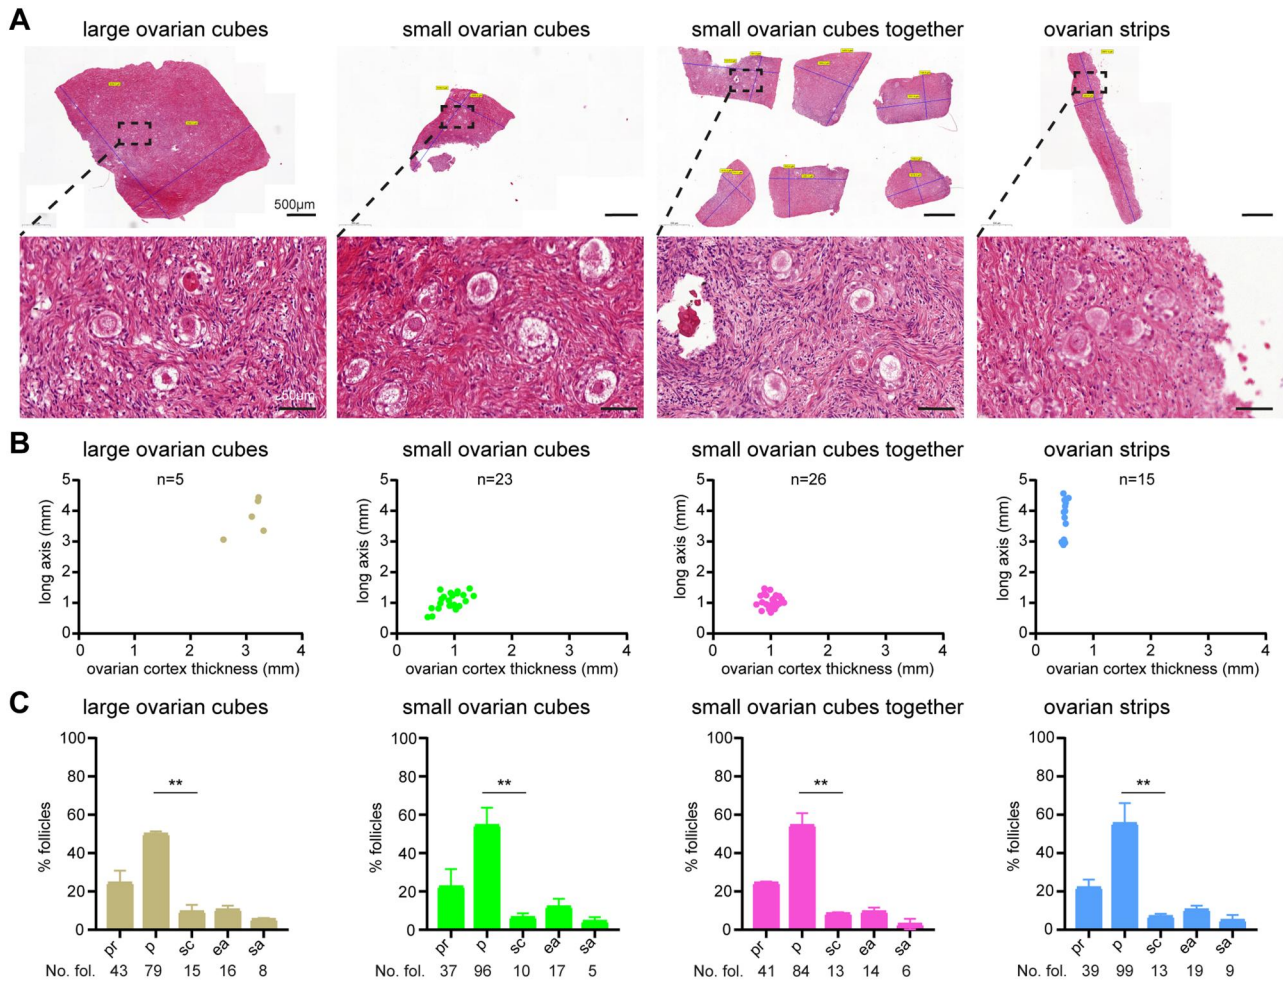

**Supplementary Figure S1. Quantification of follicles in ovarian cortex pieces of different sizes.** (A) Hematoxylin and eosin (HE) staining in ovarian cortex pieces of different sizes in freshly isolated tOVA after 8 days culture after [McLaughlin et al. \(2018\)](#). Magnified image below corresponds to the dashed area. Scale bars are 500  $\mu$ m (top panels) and 50  $\mu$ m (bottom panels). (B) Dimensions of the different ovarian cortex pieces regarding the ovarian cortex thickness and long axis. Each dot represents one ovarian cortex piece (n). (C) Percentage of follicular distribution in freshly isolated tOVA of different sizes per follicular stage after culture. The results shown are mean  $\pm$  standard deviation from n pieces (in B) and the total number of follicles counted is provided below each graph; \*\*P < 0.01. pr, primordial; p, primary; sc, secondary; ea, early atretic; sa, secondary atretic.
