# Supplementary material for: In vitro growth of secondary follicles from cryopreserved-thawed ovarian cortex
Source: PubMed Central journal article supplement — Hum Reprod. 2024 Oct 21;39(12):2743–53. doi: 10.1093/humrep/deae240 (PMC11630006; doi:10.1093/humrep/deae240), 2024-10-21
Supplement: deae240_supplementary_figure_s2.pdf [file deae240_supplementary_figure_s2.pdf]

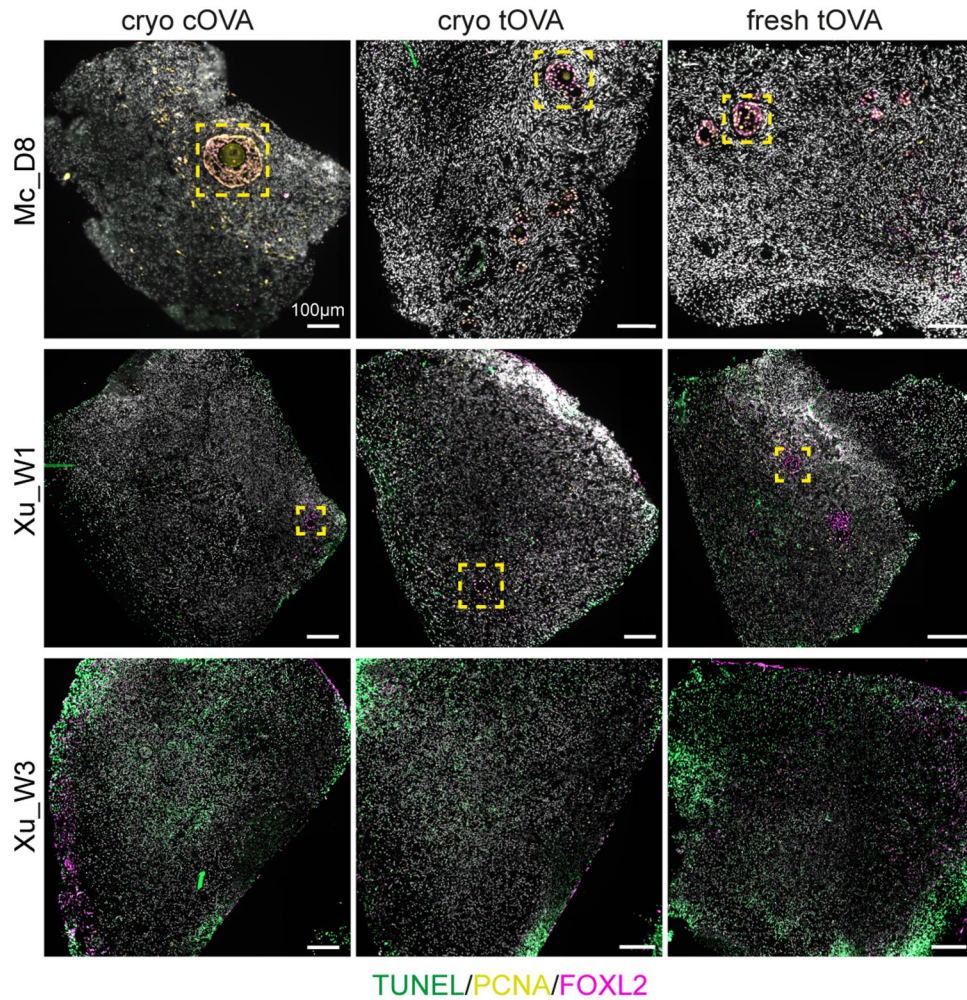

**Supplementary Figure S2. TUNEL staining in the ovarian cortex after different culture conditions.** Immunofluorescence for PCNA (yellow) and FOXL2 (magenta) together with TUNEL staining (green) in cryo-thawed cOVA, cryo-thawed tOVA, and freshly isolated tOVA after culture. Dashed line highlights secondary follicles. Scale bar is 100 μm. Mc\_D8, culture after [McLaughlin et al. \(2018\)](#) for 8 days; Xu\_W1/W3, culture after [Xu et al. \(2021\)](#) for 1/3 weeks.
