# Supplementary material for: In vitro growth of secondary follicles from cryopreserved-thawed ovarian cortex
Source: PubMed Central journal article supplement — Hum Reprod. 2024 Oct 21;39(12):2743–53. doi: 10.1093/humrep/deae240 (PMC11630006; doi:10.1093/humrep/deae240), 2024-10-21
Supplement: deae240_supplementary_table_s1.pdf [file deae240_supplementary_table_s1.pdf]

**Supplementary Table S1.** Characteristics of the donors of ovarian cortical tissue.

| Donor ID <sup>a</sup> | Age (years) | Type of gender affirming hormone therapy | Duration of gender affirming hormone therapy (months) | Period of cryopreservation (years) |
|-----------------------|-------------|------------------------------------------|-------------------------------------------------------|------------------------------------|
| tOVA96                | 27          | Nebido                                   | 64                                                    | 1                                  |
| tOVA98                | 25          | Nebido                                   | 41                                                    | 1                                  |
| tOVA100               | 19          | Sustanon                                 | 38                                                    | 1                                  |
| cOVA18                | 17          | –                                        | –                                                     | 16                                 |
| cOVA22                | 31          | –                                        | –                                                     | 16                                 |
| cOVA26                | 30          | –                                        | –                                                     | 16                                 |

<sup>a</sup> tOVA, ovary from trans masculine donor; cOVA, ovary from cis female donor.
