# Supplementary material for: In vitro growth of secondary follicles from cryopreserved-thawed ovarian cortex
Source: PubMed Central journal article supplement — Hum Reprod. 2024 Oct 21;39(12):2743–53. doi: 10.1093/humrep/deae240 (PMC11630006; doi:10.1093/humrep/deae240), 2024-10-21
Supplement: deae240_supplementary_table_s2.pdf [file deae240_supplementary_table_s2.pdf]

**Supplementary Table S2.** Quantification of total number of follicles per ovarian cortex cube per donor per condition.

| Conditions |                              | D0     |        |         | Mc_D8  |        |         | Xu_W1  |        |         | Xu_W3  |        |         |
|------------|------------------------------|--------|--------|---------|--------|--------|---------|--------|--------|---------|--------|--------|---------|
| Donors     |                              | tOVA96 | tOVA98 | tOVA100 |
| Fresh_tOVA | Total follicles              | 214    | 158    | 132     | 135    | 165    | 127     | 148    | 153    | 114     | 124    | 169    | 128     |
|            | Total cubes (with follicles) | 6      | 5      | 6       | 6      | 3      | 7       | 5      | 5      | 6       | 4      | 5      | 7       |
|            | Total follicles/cube         | 36     | 32     | 22      | 23     | 55     | 18      | 30     | 31     | 19      | 31     | 34     | 18      |
| Conditions |                              | D0     |        |         | Mc_D8  |        |         | Xu_W1  |        |         | Xu_W3  |        |         |
| Donors     |                              | tOVA96 | tOVA98 | tOVA100 |
| Cryo_tOVA  | Total follicles              | 189    | 166    | 145     | 136    | 178    | 159     | 113    | 207    | 146     | 153    | 116    | 142     |
|            | Total cubes (with follicles) | 7      | 6      | 6       | 7      | 5      | 6       | 7      | 4      | 5       | 4      | 6      | 5       |
|            | Total follicles/cube         | 27     | 28     | 24      | 19     | 36     | 27      | 16     | 52     | 29      | 38     | 19     | 28      |
| Conditions |                              | D0     |        |         | Mc_D8  |        |         | Xu_W1  |        |         | Xu_W3  |        |         |
| Donors     |                              | cOVA18 | cOVA22 | cOVA26  |
| Cryo_cOVA  | Total follicles              | 231    | 150    | 100     | 175    | 191    | 149     | 153    | 124    | 171     | 126    | 191    | 136     |
|            | Total cubes (with follicles) | 4      | 3      | 5       | 5      | 3      | 8       | 4      | 2      | 7       | 2      | 5      | 3       |
|            | Total follicles/cube         | 58     | 50     | 20      | 35     | 64     | 18      | 38     | 62     | 24      | 63     | 38     | 45      |

D0, day zero; Mc\_D8, culture after [McLaughlin et al. \(2018\)](#) for 8 days; Xu\_W1/W3, culture after [Xu et al. \(2021\)](#) for 1/3 weeks; cryo, cryopreserved; tOVA, ovaries from trans masculine donors; cOVA, ovaries from cis female donors.
