# Supplementary material for: In vitro growth of secondary follicles from cryopreserved-thawed ovarian cortex
Source: PubMed Central journal article supplement — Hum Reprod. 2024 Oct 21;39(12):2743–53. doi: 10.1093/humrep/deae240 (PMC11630006; doi:10.1093/humrep/deae240), 2024-10-21
Supplement: deae240_supplementary_table_s3.pdf [file deae240_supplementary_table_s3.pdf]

**Supplementary Table S3.** Quantification of secondary follicles per culture condition.

| Number of KRT19+ secondary follicles/total secondary follicles (%) |            |             |             |            |
|--------------------------------------------------------------------|------------|-------------|-------------|------------|
|                                                                    | D0         | Mc_D8       | Xu_W1       | Xu_W3      |
| cryo_cOVA                                                          | 0/4 (0%)   | 4/16 (25%)  | 2/15 (13%)  | 0/2 (0%)   |
| cryo_tOVA                                                          | 0/3 (0%)   | 17/21 (81%) | 15/19 (79%) | 3/5 (60%)  |
| fresh_tOVA                                                         | 0/5 (0%)   | 12/17 (71%) | 18/22 (82%) | 5/7 (71%)  |
| Number of ACTA2+ secondary follicles/total secondary follicles (%) |            |             |             |            |
|                                                                    | D0         | Mc_D8       | Xu_W1       | Xu_W3      |
| cryo_cOVA                                                          | 2/2 (100%) | 9/13 (69%)  | 8/12 (67%)  | 0/4 (0%)   |
| cryo_tOVA                                                          | 2/2 (100%) | 4/23 (17%)  | 2/17 (12%)  | 0/5 (0%)   |
| fresh_tOVA                                                         | 4/4 (100%) | 3/19 (16%)  | 4/22 (18%)  | 0/5 (0%)   |
| Number of TUNEL+ secondary follicles/total secondary follicles (%) |            |             |             |            |
|                                                                    | D0         | Mc_D8       | Xu_W1       | Xu_W3      |
| cryo_cOVA                                                          | 0/3 (0%)   | 0/10 (0%)   | 4/11 (36%)  | 3/4 (75%)  |
| cryo_tOVA                                                          | 0/3 (0%)   | 0/15 (0%)   | 5/13 (38%)  | 4/4 (100%) |
| fresh_tOVA                                                         | 0/4 (0%)   | 0/17 (0%)   | 5/19 (26%)  | 8/8 (100%) |
| Number of STAR+ secondary follicles/total secondary follicles (%)  |            |             |             |            |
|                                                                    | D0         | Mc_D8       | Xu_W1       | Xu_W3      |
| cryo_cOVA                                                          | 0/2 (0%)   | 3/14 (21%)  | 2/10 (20%)  | 0/3 (0%)   |
| cryo_tOVA                                                          | 0/4 (0%)   | 17/20 (85%) | 11/16 (69%) | 2/3 (67%)  |
| fresh_tOVA                                                         | 0/4 (0%)   | 15/17 (88%) | 16/22 (73%) | 4/6 (67%)  |

D0, day zero; Mc\_D8, culture after [McLaughlin et al. \(2018\)](#) for 8 days; Xu\_W1/W3, culture after [Xu et al. \(2021\)](#) for 1/3 weeks; cryo, cryopreserved; tOVA, ovaries from trans masculine donors; cOVA, ovaries from cis female donors.
